# Supplementary material for: Identifying groundwater compartmentalisation for hydraulic fracturing risk assessments
Source: Royal Society of Chemistry journal article supplement (doi:10.1039/c8em00300a), 2018-10-30
Supplement: c8em00300a2.xlsx [file c8em00300a2.xlsx]

## Sheet: Table S1
EA Location Name	EA Easting	EA Northing	Alkalinity to pH 4.5 as CaCO3 (mg/l)	HCO3 (mg/l)	Barium (μg/l)	Calcium (mg/l)	Chloride (mg/l)	Conductivity at 20°C (μS/cm)	Conductivity at 25°C (μS/cm)	Iron (μg/l)	Magnesium (mg/l)	Manganese (μg/l)	pH	Potassium (mg/l)	Sodium (mg/l)	Strontium (μg/l)	Sulphate as SO4 (mg/l)	Total Dissolved Solids (mg/l)	BGS Location Name	BGS Easting	BGS Northing	BGS Reference	BGS Reg No.	BGS Depth (m)	BGS Year	BGS Datum (m)	BGS Aquifer
BLACKPOOL PROMENADE NO.10 BH	330360	432540	272.6	166.286		89.4	285.6		1570	9353.73	34.925	403.7	7.352	15.475	194.5	413.75	94.35	880.536	BLACKPOOL PROMENADE BH NO 10	330360	432540	SD33/44	SD33SW150/BJ	14.2	2000	5.9	SUPERFICIAL DEPOSITS
BLACKPOOL PROMENADE NO.9 BH	330360	432710	247	150.67		1129.07	321.333		1643.33	1885.67	33.4	1374.67	7.49667	16.1333	216	2152	105.3	1971.9	BLACKPOOL PROMENADE BH NO 9	330360	432710	SD33/43	SD33SW149/BJ	15	2000	6.7	SUPERFICIAL DEPOSITS
BLACKPOOL PROMENADE NO.12 BH	330380	432060	198.5	121.085		147.767	389.75		1750.75	10853.5	51.9333	633.333	7.815	19.8667	235.933	612.667	81.0333	1047.37	BLACKPOOL PROMENADE BH NO 12	330380	432060	SD33/46	SD33SW152/BJ	15	2000	0	SUPERFICIAL DEPOSITS
BLACKPOOL PROMENADE NO.11 BH	330380	432210	255.8	156.038		301.75	194.6		1230	12351.1	32.225	733.25	7.3	10.54	110.75	821.25	87.825	893.728	BLACKPOOL PROMENADE BH NO 11	330380	432210	SD33/45	SD33SW151/BJ	15	2000	0	SUPERFICIAL DEPOSITS
BLACKPOOL PROMENADE NO 1 BH	330380	434960	328.2	200.202		345	2270		6122	5878	168.8	1109.6	7.296	33.38	992	3062	278.4	4287.78	BLACKPOOL PROMENADE BH NO 1	330580	434930	SD33/35	SD33SW141/BJ	17.3	2000	0	SUPERFICIAL DEPOSITS
BLACKPOOL PROMENADE NO.13 BH	330410	431840	297.2	181.292		324.15	267		1558.8	64272.5	59.325	1421.4	7.414	21.675	213.95	1053.25	108.15	1175.54	BLACKPOOL PROMENADE BH NO 13	330410	431840	SD33/47	SD33SW153/BJ	15.5	2000	7.2	SUPERFICIAL DEPOSITS
BLACKPOOL PROMENADE NO.8 BH	330420	433320	210.583	128.456		140.24	489.167		2115	39850.9	43.48	1865.46	7.88833	24.56	350	625.2	106.78	1282.68	BLACKPOOL PROMENADE BH NO 8	330420	433320	SD33/42	SD33SW148/BJ	15	2000	0	SUPERFICIAL DEPOSITS
BLACKPOOL PLEASURE BEACH NO.3 BH	330440	432950	226.2	137.982		230.425	86.08		826.8	33075.8	30.7	682.8	7.248	10.8375	49.2	730.75	73.225	618.449	BLACKPOOL PLEASURE BEACH BH NO 3	330440	432950	SD33/51	SD33SW138/BJ	15	2000	6.3	SUPERFICIAL DEPOSITS
BLACKPOOL PROMENADE NO.7 BH	330470	433510	842.25	513.773		503.275	454		1965.25	77077.5	97.275	5512.2	7.545	16.3	247.5	1292.75	94.95	1927.07	BLACKPOOL PROMENADE BH NO 7	330470	433510	SD33/41	SD33SW147/BJ	15	2000	0	SUPERFICIAL DEPOSITS
BLACKPOOL SOLARIUM RECREATION GROUND BH	330490	432390	239.75	146.248		622.633	95.45		910.25	119457	73.5	4665.73	7.0975	11.2667	70.6667	2000.67	84.6	1104.36	BLACKPOOL SOLARIUM RECREATION GROUND	330490	432390	SD33/48	SD33SW135/BJ	15	2000	7.3	SUPERFICIAL DEPOSITS
BLACKPOOL PROMENADE NO.6 BH	330500	433780	225.5	137.555		366.5	3787.5		12535	1099.3	264.75	1186.15	7.3575	86.125	2157.5	2542.5	526.75	7326.68	BLACKPOOL PROMENADE BH NO 6	330510	433800	SD33/40	SD33SW146/BJ	15	2000	0	SUPERFICIAL DEPOSITS
BLACKPOOL PROMENADE NO.5 BH	330510	433960	206.75	126.118		351.5	2519.5		8137.5	12861.5	210.35	1686	7.47	42.7	1427.5	1994	403.5	5081.17	BLACKPOOL PROMENADE BH NO 5	330520	433960	SD33/39	SD33SW145/BJ	15	2000	0	SUPERFICIAL DEPOSITS
BLACKPOOL PROMENADE NO.4 BH	330540	434200	213.75	130.387		343.667	3217		9865	7368.2	166.733	2476.3	7.325	46.0667	1494.67	1631	363.333	5761.85	BLACKPOOL PROMENADE BH NO 4	330540	434210	SD33/38	SD33SW144/BJ	11.2	2000	3.8	SUPERFICIAL DEPOSITS
BLACKPOOL PROMENADE NO.3 BH	330550	434440	715.2	436.272		124	1101.2		3968	5284.5	35.75	594.5	7.306	16.8	226.225	576.5	157.25	2097.5	BLACKPOOL PROMENADE BH NO 3	330550	434440	SD33/37	SD33SW143/BJ	15	2000	0	SUPERFICIAL DEPOSITS
BLACKPOOL PROMENADE NO.2 BH	330570	434700	391.8	238.998		331.66	2217		8040	961.56	148.46	1578.68	7.19	51.58	1280.4	1632.6	318.6	4586.7	BLACKPOOL PROMENADE BH NO 2	330570	434700	SD33/36	SD33SW142/BJ	9.3	2000	0	SUPERFICIAL DEPOSITS
BLACKPOOL PLEASURE BEACH NO.1 BH	330580	433520	206.714	126.096		361.729	34.1143		582.429	148867	41.0143	4838	7.33714	5.27714	38.2571	1207.14	25.3329	631.82	BLACKPOOL PLEASURE BEACH BH NO 1	330580	433520	SD33/49	SD33SW136/BJ	15	2000	0	SUPERFICIAL DEPOSITS
BLACKPOOL PLEASURE BEACH NO.4 BH	330600	432940	199.262	121.55		108.333	71.3125		705.25	4908.17	9.10833	370.05	7.4075	8.43	38.1367	309.833	41.2333	398.104	BLACKPOOL PLEASURE BEACH BH NO 4	330600	432940	SD33/52	SD33SW139/BJ	15	2000	0	SUPERFICIAL DEPOSITS
BLACKPOOL PLEASURE BEACH NO.2 BH	330700	433550	267.625	163.251		120.75	102.275		915.75	14632	11.7	946.125	7.12875	6.85375	59.5375	423.75	22.9275	487.295	BLACKPOOL PLEASURE BEACH BH NO 2	330700	433550	SD33/50	SD33SW137/BJ	15	2000	7.9	SUPERFICIAL DEPOSITS
00473 AD-HOC @ JAMESON RD LFS FLEETWOOD	333200	445800	1263.14	770.515		159.083	1910.75	7455.83	3663.33	29965.8	238.642	12943.3	7.48182	104.675	1412.53		250.1	4846.3
ROYAL LYTHAM & ST ANNES GOLF CRS SD32/7	333500	428200	270	164.7	41	94.15	33.95	546		1840	9.67	457	7.72	3.6	20.1	227	18.35	344.52	ROYAL LYTHAM ST.ANNES GOLF CLUB	333500	428200	SD32/7	SD32NW52/BJ	0			UNKNOWN
ROYAL LYTHAM ST ANNES GOLF CLUB WELL PT	333800	428200	155.45	94.8245	48.2	109.5	24.5	610.5		2225	10.205	703	7.575	3.985	23.2	262.5	20.9	287.115	ROYAL LYTHAM ST ANNES GOLF CLUB	333800	428200	SD32/15B	SD32NW29/BJ	27.5	1996		SUPERFICIAL DEPOSITS
00545 AD-HOC @ WESTBY LFS ANNA'S RD WEST	335706	431077	458	279.38		213	289	1790		4380	98.3	776	7.2	4.63	119		208	1211.31
00043 AD-HOC @ ICI LTD HILLHSE WKS PO BO	336100	446700	500.4	305.244		356	316.66	2380	2507.5	112000	62.3	1490	8.928	16.3	183		146.034	1385.54
00386 AD-HOC @ KINGSCOURT DEVELOPMENT PO	336200	438500	387.75	236.528		337.25	138.25	1590		28375	44.15	2960	7.075	17.885	71.1		413	1258.16
00590 AD-HOC @ BRACEWELL AVENUE POULTON-	336300	439100	885	539.85		454	58.7	1520		87700	31.9	3930	7.1	24.2	142		330	1580.65
LYTHAM GREEN DRIVE GOLF CLUB BH	337000	428200	277	168.97	88	88.6	221.85	1416.5	1160	1124.5	20.5	87	7.5425	3.1075	180	700.25	97.3	780.327	LYTHAM GREEN DRIVE GOLF CLUB	336980	428200	SD32/14A	SD32NE34/BJ	25	1996	4.8	SUPERFICIAL DEPOSITS
MARSH NURSERIES	340200	423000	296.5	180.865	85.25	119.8	66.4	766.5		5940	15.865	1097.5	7.45	11.67	44.45	687.5	89.75	528.8	MARSH NURSERIES	340200	423000	SD42/26	SD42SW7/BJ	6.2			SUPERFICIAL DEPOSITS
TRIMPELL LTD(SEA OUTFALL)TO HEYSHAM LAKE	341637	458976	263	160.43			58.3667	733	856				7.33
S LAKELAND CARAVANS, MORECAMBE SD46/38	343170	463030	169	103.09	80.6	322	1290	3870		566	143	176	7.46	14.8	288	2990	103	2263.89	SOUTH LAKELAND CARAVANS, MORECOMBE	343170	463030	SD46/38	SD46SW587/BJ	108	2003	5.5	MILLSTONE GRIT GROUP [SEE ALSO MIGR]
KIRKHAM OBH(P) WRB NO. SD43/20 7/1.1/11	343270	432480	5	3.05	112	1285	77000	251500		46650	502.5	1034	7.365	61.1	51550	19050	6085	136487	KIRKHAM	343240	432470	SD43/20	SD43SW6/BJ	444.9	1970	10.37	MERCIA MUDSTONE GROUP
FORSHAW SALADS NO2 BH SD42/31B	344050	420030	148	90.28	10	166	207.5		1990	5065	70.9	303	7.115	7.8	194.5	2495	648.5	1385.48	THREE ACRES NURSERIES	344050	420030	SD42/31B	SD42SW5/BJ	48	1997	10.89	MERCIA MUDSTONE GROUP
FORSHAW SALADS NO1 BH SD42/31A	344410	420650	189.143	115.377	16.9667	216.143	217.857	2255	2680	6997.14	94.5	423.714	7.30286	21.9529	227.857	3427.14	877.857	1771.54	THREE ACRES NURSERIES	344410	420650	SD42/31A	SD42SW4/BJ	66	1996	12.4	MERCIA MUDSTONE GROUP
ORCHARD END EAGLAND HILL (ICI NO 14)	344770	445550	317.5	193.675	379.714	56.31	34.19	584.667	649.75	1212.31	17.94	90.62	7.454	3.975	59.43	326.8	11.81	377.33
00478 GAS 12, 13, 1A @ MUCH HOOLE LFS STATION RD	345600	424200	739.667	451.197			2231		5316.67				7.08333				217.933
00483 AD-HOC @ SALT AYRE LFS OVANGLE RD	345700	462500	639.5	390.095		428	193.805	2007	5553.43	185842	46.0775	2638.75	6.95737	43.8383	158.333		76.1853	1336.33
00474 G&G 87 @ CLIFTON MARSH LFS NEWTON	345877	428843	160	97.6		195	79.5	1400		159000	26.9	2710		22.4	55.7		682	1159.1
00474 G&G 86 @ CLIFTON MARSH LFS NEWTON	345940	428830	242.333	147.823		130.333	315.333	3373.33		63933.3	143.933	1097.67	7	83.6667	318		48.1333	1187.22
00474 G&G 92 @ CLIFTON MARSH LFS NEWTON	345961	428137	718.5	438.285		126.733	11127.5	13166.7	22300	7040	158.967	347.2	7.1225	74.6667	2800		546.3	15272.5
00474 AD-HOC G&G 19, 35, 36, 38, 39A, 40, 42, 43, 44, 50, 58, 60, 62, 77 @ CLIFTON MARSH LFS NEWTON	346000	428000	416.552	254.097		175.516	122.036	1670.37	1718.33	65001.6	70.2105	2341.37	6.8904	31.6374	133.789		108.27	895.555
PLOCKS FARM, BRETHERTON SD42/34	346020	420800	174	106.14		397	257.5		3190	4655	63.75	643	7.275	9.32	326.5	2080	1300	2460.21	PLOCKS FARM ABH, TARLETON	346020	420880	SD42/34	SD42SE37/BJ	78	2000	6.5	MERCIA MUDSTONE GROUP
00474 G&G 91 @ CLIFTON MARSH LFS NEWTON	346049	428149	702	428.22		194	4330	12800		12700	242	287	7.5	87.1	2750		567	8598.32
00474 G&G 79 @ CLIFTON MARSH LFS NEWTON	346063	428801	718.5	438.285		260	201	2285		89550	118.3	4700	6.9	33.2	159.5		23.9	1234.18
00474 G&G 90 @ CLIFTON MARSH LFS NEWTON	346170	428203	809.333	493.693		98.05	675	3630	3740	18700	108.5	457	6.99667	44.35	646.5		190.667	2256.76
00474 G&G 89 @ CLIFTON MARSH LFS NEWTON	346233	428216	1050	640.5		70.7	174	1990		6510	92.6	300	7.8	59.7	321		45.3	1403.8
00474 G&G 88 @ CLIFTON MARSH LFS NEWTON	346325	428249	1055	643.55		86.4667	561.75	3086.67	3360	8623.33	98.8	433.667	7.28	54.7333	563.333		71.25	2079.88
B.N.F.L. SPRINGFIELDS FACTORY NO2 BH	346500	431800	402.667	245.627	303	95.1333	24.6333	699	757.5	2373.33	28.7667	46.6667	7.16667	2.27	28.6333	754.667	24.4333	449.497	SPRINGFIELDS FACTORY	346520	431300	SD43/4D	SD43SE205/BJ	213.7	1941	20.9	SHERWOOD SANDSTONE GROUP
00474 G&G 61 @ CLIFTON MARSH LFS NEWTON	346663	428362	903.5	551.135		56.9	325.5	2070	2800	3350	69	174	7.4	60.7	293		62.15	1418.38
B.N.F.L. SPRINGFIELDS FACTORY NO3 BH	346700	431200	390	237.9	310	101	23		755	2810	30.7	57.3	7	2.19	24.2	780	24	442.99	SPRINGFIELDS FACTORY	346730	431300	SD43/4C	SD43SE202/BJ	153.6	1941	21	SHERWOOD SANDSTONE GROUP
LANCASTER CANAL AT ALDCLIFFE	346962	460413	200.5	122.305		85.25	27.6		517		5.565		7.8
B.N.F.L. SPRINGFIELDS FACTORY NO1 BH	347100	431600	385.333	235.053	305	98.9667	24.2	676	751	2736.67	30.7	59.6	7.46333	2.28667	21.9	814	23.2333	436.34	SPRINGFIELDS FACTORY	347160	431650	SD43/4A	SD43SE1/BJ	152.4	1941	17.9	SHERWOOD SANDSTONE GROUP
B.N.F.L. SPRINGFIELDS FACTORY NO4 BH	347200	431000	375.333	228.953	316.333	101.7	22.6667	686.667		8303.33	27.1	27.2	7.44333	2.45667	25.3667	720.333	27.6667	435.91	SPRINGFIELDS FACTORY	347250	431020	SD43/4B	SD43SE4/BJ	153.7	1941	16.4	SHERWOOD SANDSTONE GROUP
LOWER BURROW FARM WELL SD45/9	347650	457220	285.75	174.308	186	129.75	48.75	696.75		104.25	10.9075	10	7.26	2.79	21.7	240.5	36.625	424.83	LOWER BURROW FARM	347650	457220	SD45/9	SD45NE255/BJ	0			UNKNOWN
WITHINGTON BARN FARM	348000	417800	294	179.34	119	17.4	28.075	621.75		1590	6.3925	39.3	7.52	2.635	133	266	57.5	424.342	JOSEPH DEWHURST	348000	417800	SD41/85	SD41NE49/BJ	0			UNKNOWN
DRINKWATER MUSHROOMS SD45/23	349240	454610	385	234.85	55	1.24	27.5	652		108	0.3	10	9.1	1.15	173	15.6	1	439.04	HURSTWOOD FARM, GALGATE	349240	454610	SD45/23	SD45SE149/BJ	0	2003	38	NOT ENTERED
HILLSBOROUGH NURSERIES BH	349380	424610	297.1	181.231	15.1714	221.9	28.04	1220	1317.5	2043	41.86	99.21	7.232	2.93	34.04	4434	440.9	950.901	HILLSBOROUGH NURSERIES	349380	424610	SD42/30	SD42SE13/BJ	27	1994	18.9	SUPERFICIAL DEPOSITS
C0010 115, 117, GAS 104, GAS 107, GAS112 @ ULNES WALTON LFS, PHASE 2, R	349500	420400	449.2	274.012			72.04		1206				7.354				108.5
DRINKWATER MUSHROOMS SD45/22	349970	457170	258	157.38	376	53.7	18.8	470		1400	14.9	135	7.35	4.87	34.2	355	4.32	288.17	CONDERGARTH FARM, ELLER	349970	457170	SD45/22	SD45NE256/BJ	0	2003	66.6	NOT ENTERED
00475 22, GAS 1, GAS 24, GAS 501 @ ULNES WALTON, PHASE 1	350000	420000	389.5	237.595			36.475		863.25				7.23				81.3
THE GABLES BH	350330	461240	247	150.67	2830	45.9763	19.4	455	490.4	346.413	12.2812	34.1375	7.6175	7.63413	28.925	1014	14.4588	279.345	THE GABLES, DAISY BANK	350330	461240	SD56/26	SD56SW120/BJ	54.9	1965	121.9	MILLSTONE GRIT GROUP [SEE ALSO MIGR]
MIDDLE CRAG FARM BH	351030	455110	168	102.48	116	57	17.5	365		30	8.5	10	7.26	1.24	9.46	141	16.7	212.88	MIDDLE CRAG FARM	351060	455060	SD55/6A	SD55NW39/BJ	45.7	1973	139.1	CARBONIFEROUS ROCKS (UNDIFFERENTIATED)
00217 AD-HOC @ LIGHTFOOT GREEN FM FULWOO	351200	434000	572.333	349.123		462.333	87.5	1175.33		79266.7	25.4333	1840	7.2	50.2	65.3667		34.4	1074.36	LIGHTFOOT GREEN FARM SI 6	351180	434000	SD53/60K	SD53SW353/BJ	23.6	1973		SUPERFICIAL DEPOSITS
MIDDLE CRAG BAY HORSE SD55/16	351320	454920	270	164.7		9.88	28		608	652	3.8	14.5	8.45	7.53	121	220	17.4	352.31	MIDDLE CRAG BAY HORSE	351320	454920	SD55/16	SD55SW64/BJ	0		134.3	UNKNOWN
NOOK HOUSE SD55/88	351350	454890	346	211.06	323	20.1	18.6		671	495	10.2	10.7	7.89	9.36	124	492	17.8	411.12	NOOK HOUSE	351350	454890	SD55/88	SD55SW37/BJ	0		132.7	UNKNOWN
BARTON GRANGE NURSERY	352440	437150	305.7	186.477	151.429	125.6	35.16	698	811.5	156.62	20.73	11.83	7.252	4.003	18.02	243.8	67.47	457.46	BARTON GRANGE NURSERY	352440	437150	SD53/61	SD53NW19/BJ	50	1986	31.8	SHERWOOD SANDSTONE GROUP
PRESTON LAUNDRY SD53/66	353900	430200	279	170.19	161	79.1	18.5	534		2390	19.7	19.6	7.49	1.64	16.2	402	28	333.33	EMMETT DENIM CARE	353900	430200	SD53/66	SD53SW157/BJ	95			SHERWOOD SANDSTONE GROUP
LOW MOOR HEAD FARM	354120	456160	298.25	181.933	525.25	70.2	9.075	502.25		115.075	17.875	779.75	7.1075	4.3825	22.9	331	3.7125	310.077	LOW MOORHEAD FARM	354120	456150	SD55/2	SD55NW38/BJ	61	1969	211.8	COAL MEASURES GROUP
CATSHAW HALL FARM BH	354690	453540	167.625	102.251	127	59.1	17.4625	379.5	376	30.25	8.8575	10	7.06	1.28	9.71375	148.5	17.7125	216.377	CATSHAW HALL FARM	354750	453540	SD55/1	SD55SW1/BJ	45.7	1962	134.8	MILLSTONE GRIT GROUP [SEE ALSO MIGR]
SUPREME LAUNDRY ABS BH PRESTON	354910	429700	181.8	110.898	99.225	60.625	23.725	436		2355.25	14.0375	33.975	7.715	1.5875	22.3	204.875	37.9	271.073	SUPREME LAUNDRY	354910	429700	SD52/68	SD52NW175/BJ	0			UNKNOWN
BROCKHOLES VIEW (LIQUID PLASTICS)	355230	429460	514	313.54	46.4	190	33.45	1250		4215	58.95	76	7.145	2.965	59.35	1365	359.5	1017.75	BROCKHOLES VIEW	355210	429430	SD52/38	SD52NE14/BJ	152	1908	36.89	SHERWOOD SANDSTONE GROUP
BELL HILL	355400	461300	17.05	10.4005	52.2	10.395	14.55	121.7		47.4	2.875	27.55	6.015	3.163	7.07	38.6	15.19	63.6435	BELL HILL FARMHOUSE	355400	461300	SD56/67	SD56SE32/BJ	0		184.5	UNKNOWN
ROYAL ORDNANCE SD52/81	356050	420300	275	167.75	261	74.2	35.4	713		221	16.4	329	7.57	2.33	73.3	606	104	473.38	ROYAL ORDNANCE PLC, EUXTON	356050	420300	SD52/81	SD52SE398/BJ	160	2003	56.9	NEW RED SANDSTONE SUPERGROUP
MIDDLE LEE FARM SPRING SD55/10	356290	455960	32.8333	20.0283	19.3333	8.50667	8.42667	97.1667		40	3.18667	10	6.58	0.584667	5.75	17.5333	9.12667	55.6097	HIGHER LEE FARM	356290	455960	SD55/10	SD55NE11/BJ	0			UNKNOWN
00074 AD-HOC @ CLAYTON HALL SAND QY, DAW	356600	421500	268.8	163.968		379.5	39.4	3050	743.667	13395	43.7	598	8.87	35.6	241		315.8	1218.97
KEPACK, BAMBER BRIDGE SD52/80	356626	425036	304	185.44	191	79.5	37.1	639		783	25.8	381	7.59	3.21	37.2	714	42	410.25	KEPAK LTD, BAMBER BRIDGE	357000	424600	SD52/80	SD52SE397/BJ	36.6	2003	61.8	SHERWOOD SANDSTONE GROUP
WOODFOLD FARMHOUSE	356820	442180	329	200.69	12.6	14.1	38.2	634		30	6.48	10	7.8	1.69	132	41.4	51.1	444.26	WOODFOLD FARM	356820	442180	SD54/86	SD54SE5/BJ	0	1995	179.5	UNKNOWN
FYLDE ICE COLD STORAGE,B BDGE SD52/79	357490	425590	344	209.84	42.9	95.9	45.9	766		43.4	32.6	734	7.42	3.65	42.7	1500	60.6	491.19	FYLDE ICE CO, WALTON SUMMIT, PRESTON	357490	425590	SD52/79	SD52NE726/BJ	0			NOT ENTERED
SALLOM HOUSE FARM BH	358020	428310	273.6	166.896	10	74.78	23.73	574	629.75	352.55	26.64	11.88	7.455	3.261	21.87	99.08	52.07	369.247	SALLOM HOUSE FARM	358020	428310	SD52/27	SD52NE236/BJ	70.1	1992	41.8	SHERWOOD SANDSTONE GROUP
INTERBREW UK LTD	358260	429680	334.5	204.045	13.3	73.75	25.9	688.5		145	45.4	113	7.59	2.88	27.85	161	61	440.825	WHITBREAD BREWERY NO 5	358260	429680	SD52/57	SD52NE291/BJ	81.5	1979	14.02	SHERWOOD SANDSTONE GROUP
BROCKHOLES QUARRY SD53/76	358630	430790	339	206.79	107	126	28.3	702		11000	18.2	9860	6.69	1.44	8.36	326	62.4	451.49	BROCKHOLES QUARRY	358630	430790	SD53/76	SD53SE566/BJ	45	2004	9	NOT ENTERED
SUNLIGHT SERVICES, CHORLEY BH SD51/192	358790	419030	345.333	210.653	204	59.3667	34.6	681		180.333	20.5333	51.5333	7.71	7.96333	77.0333	416.333	35.4	445.55	SUNLIGHT LAUNDRY CHORLEY LANCS	358850	418970	SD51/192	SD51NE195/BJ	152	2000	91	COAL MEASURES GROUP
KEEPERS COTTAGE,MARSHAW,SPRING SD55/13	359400	453700	24.35	14.8535	92.625	5.325	8.76	85.6		66	3.3725	10	6.29	0.7355	6.77	20.4	6.75	46.5665	MARSHAW ABBEYSTEAD	359400	453700	SD55/13	SD55SE21/BJ	42.7	1973		UNKNOWN
ELSTON OLD HALL FARM BH	360000	432500	310.667	189.507	57.6	91.7222	28.8333	681	758.5	30	29.3556	10	7.245	2.2	28.2444	276.889	57.0889	426.951	ELSTON OLD HALL FARM	360000	432500	SD63/34	SD63SW112/BJ	0			UNKNOWN
SINGLETON'S DAIRY BOREHOLE	360180	437000	263.9	160.979	93	62.35	12.81	469.2	525.6	2876	19.97	457.2	7.138	1.364	22.2	156.2	10.134	289.807	SINGLETON'S DAIRY B/H	360180	437000	SD63/33	SD63NW10/BJ	0		110	MILLSTONE GRIT GROUP [SEE ALSO MIGR]
SIMPSONS FARM BH	360720	428590	282.2	172.142	71.2429	57.46	39.48	604.5	674.25	538.1	21.52	171.6	7.376	3.313	58.57	180.2	27.81	380.295	SIMPSON'S FARM	360720	428600	SD62/102	SD62NW44/BJ	64	1990	55.89	CARBONIFEROUS ROCKS (UNDIFFERENTIATED)
SADDLESIDE SPRINGS	361300	445900	22.8	13.908		8.47	12.4		107	30	3.18	10	6.44	0.922	6.48	21.7	9.76	55.12	SADDLE SIDE FARM	361300	445900	SD64/6	SD64NW11/BJ	0		330	UNKNOWN
POLE FARM, CHIPPING SD64/69	362710	442000	254	154.94		69.4			634	206	9.87	323	7.64	2.21	45.2	553	45.9		POLE FARM, CHIPPING	362710	442000	SD64/69	SD64SW14/BJ	63	2000	89.2	CARBONIFEROUS LIMESTONE SUPERGROUP
PARK GATE, CHIPPING SD64/68	362710	445360	367	223.87		107	10		643	1740	14.4	132	7.17	7.26	17.2	1450	21.4	401.13	PARK GATE, CHIPPING	362710	445360	SD64/68	SD64NW15/BJ	0		204.1	CARBONIFEROUS LIMESTONE SUPERGROUP
C0006 AD-HOC, GAS 20, GAS 27, GAS 5 @ WITHNELL QY, BOLTON RD, W	363900	424000	136.72	83.3992		58.5829	143.56	809.286	653	329871	32.2857	7584.29	6.253	6.47171	49.4286		23.921	397.649
STAR PAPER MILLS BOREHOLE "C"	364210	424980	281	171.41		67.1	16.075	674.667	752	1480	26.65	425	7.175	6.6975	52.025	581	81.25	421.207	STAR PAPER MILLS LTD	364210	425010	SD62/3E	SD62NW77/BJ	53		96.89	CARBONIFEROUS ROCKS (UNDIFFERENTIATED)
LOWER GREYSTONELEY BH	364300	445200	123.978	75.6264	41.7667	48.4778	10.3667	262.2	272.5	150.544	2.49333	12.2889	7.48	1.42111	5.88111	108.989	13.2022	157.469	LOWER GREYSTONELEY	364300	445200	SD64/54	SD64NW3/BJ	34	1990	149	CHATBURN LIMESTONE GROUP AND WORSTON SHALE GROUP (UNDIFFERENTIATED)
STAR PAPER MILLS BOREHOLE "L"	364340	424770	234	142.74		69.4	18.7		767	1740	28.1	638	7.13	6.66	66.1	460	140	471.7	STAR PAPER MILLS LTD	364640	424760	SD62/3F	SD62NW1/BJ	91.4	1956	96.51	CARBONIFEROUS ROCKS (UNDIFFERENTIATED)
STAR PAPER MILLS BOREHOLE "F"	364340	424900	367.625	224.251	196.857	70.225	17.75	670	754.5	2770	27.9375	387.25	7.11125	7.095	52.575	640.25	33.1725	433.006	STAR PAPER MILLS LTD	364340	424900	SD62/3D	SD62SW3/BJ	271	1952	105.78	CARBONIFEROUS ROCKS (UNDIFFERENTIATED)
NEW DROP INN BH	364420	439010	16.56	10.1016	24.4857	7.367	14.54	99.96	112.4	74.23	1.725	15.63	6.217	0.988	9.407	32.26	10.82	54.9486	NEW DROP INN	364420	439010	SD63/43	SD63NW9/BJ	61	1995	200.2	MILLSTONE GRIT GROUP [SEE ALSO MIGR]
TWISTFIELD BH	364530	427830	172.667	105.327	60.5286	26.627	14.9222	342	387.75	206.58	13.905	88.38	7.582	1.784	35.05	94.995	12.92	210.535	TWISTFIELD	364530	427830	SD62/111	SD62NW65/BJ	54.9	1996	186	MILLSTONE GRIT GROUP [SEE ALSO MIGR]
00029 G&G 3, 6, 7 @ STOCKCLOUGH QY STOCKCLOUGH	365014	424687	567	345.87		294	43.5333	132	914.5	77500	15.3	12000	7.07	13.6	26.1		51.0667	789.47
WATSONS FARM RADDLESWORTH	365480	420830	61.08	37.2588	251.714	12.21	12.08	150.833	173.75	1761.7	7.567	701.71	6.197	0.9535	8.844	39.77	9.466	88.3793	WATSON'S FARM	365480	420900	SD62/31	SD62SE9/BJ	47.2	1966	246.5	MILLSTONE GRIT GROUP [SEE ALSO MIGR]
