# Supplementary material for: Identifying groundwater compartmentalisation for hydraulic fracturing risk assessments
Source: Royal Society of Chemistry journal article supplement (doi:10.1039/c8em00300a), 2018-10-30
Supplement: c8em00300a3.xlsx [file c8em00300a3.xlsx]

## Sheet: Table S2
EA Location Name	EA Easting	EA Northing	Alkalinity to pH 4.5 as CaCO3 (mg/l)	Barium (μg/l)	Calcium (mg/l)	Chloride (mg/l)	Conductivity at 20°C (μS/cm)	Conductivity at 25°C (μS/cm)	Iron (μg/l)	Magnesium (mg/l)	Manganese (μg/l)	pH	Potassium (mg/l)	Sodium (mg/l)	Strontium (μg/l)	Sulphate as SO4 (mg/l)
BLACKPOOL PROMENADE NO.10 BH	330360	432540	5	0	4	5	0	5	4	4	4	5	4	4	4	4
BLACKPOOL PROMENADE NO.9 BH	330360	432710	3	0	3	3	0	3	3	3	3	3	3	3	3	3
BLACKPOOL PROMENADE NO.12 BH	330380	432060	4	0	3	4	0	4	3	3	3	4	3	3	3	3
BLACKPOOL PROMENADE NO.11 BH	330380	432210	5	0	4	5	0	5	4	4	4	5	4	4	4	4
BLACKPOOL PROMENADE NO 1 BH	330380	434960	5	0	5	5	0	5	5	5	5	5	5	5	5	5
BLACKPOOL PROMENADE NO.13 BH	330410	431840	5	0	4	5	0	5	4	4	4	5	4	4	4	4
BLACKPOOL PROMENADE NO.8 BH	330420	433320	6	0	5	6	0	6	5	5	5	6	5	5	5	5
BLACKPOOL PLEASURE BEACH NO.3 BH	330440	432950	5	0	4	5	0	5	4	4	4	5	4	4	4	4
BLACKPOOL PROMENADE NO.7 BH	330470	433510	4	0	4	4	0	4	4	4	4	4	4	4	4	4
BLACKPOOL SOLARIUM RECREATION GROUND BH	330490	432390	4	0	3	4	0	4	3	3	3	4	3	3	3	3
BLACKPOOL PROMENADE NO.6 BH	330500	433780	4	0	4	4	0	4	4	4	4	4	4	4	4	4
BLACKPOOL PROMENADE NO.5 BH	330510	433960	4	0	4	4	0	4	4	4	4	4	4	4	4	4
BLACKPOOL PROMENADE NO.4 BH	330540	434200	4	0	3	4	0	4	3	3	3	4	3	3	3	3
BLACKPOOL PROMENADE NO.3 BH	330550	434440	5	0	4	5	0	5	4	4	4	5	4	4	4	4
BLACKPOOL PROMENADE NO.2 BH	330570	434700	5	0	5	5	0	5	5	5	5	5	5	5	5	5
BLACKPOOL PLEASURE BEACH NO.1 BH	330580	433520	7	0	7	7	0	7	7	7	7	7	7	7	7	7
BLACKPOOL PLEASURE BEACH NO.4 BH	330600	432940	8	0	6	8	0	8	6	6	6	8	6	6	6	6
BLACKPOOL PLEASURE BEACH NO.2 BH	330700	433550	8	0	8	8	0	8	8	8	8	8	8	8	8	8
00473 AD-HOC @ JAMESON RD LFS FLEETWOOD	333200	445800	15	0	12	15	12	3	12	12	12	11	12	12	0	15
ROYAL LYTHAM & ST ANNES GOLF CRS SD32/7	333500	428200	2	2	2	2	2	0	2	2	2	2	2	2	2	2
ROYAL LYTHAM ST ANNES GOLF CLUB WELL PT	333800	428200	2	2	2	2	2	0	2	2	2	2	2	2	2	2
00545 AD-HOC @ WESTBY LFS ANNA'S RD WEST	335706	431077	1	0	1	1	1	0	1	1	1	1	1	1	0	1
00043 AD-HOC @ ICI LTD HILLHSE WKS PO BO	336100	446700	5	0	1	5	1	4	1	1	1	5	1	1	0	5
00386 AD-HOC @ KINGSCOURT DEVELOPMENT PO	336200	438500	4	0	4	4	4	0	4	4	4	4	4	4	0	4
00590 AD-HOC @ BRACEWELL AVENUE POULTON-	336300	439100	1	0	1	1	1	0	1	1	1	1	1	1	0	1
LYTHAM GREEN DRIVE GOLF CLUB BH	337000	428200	4	3	4	4	2	2	4	4	4	4	4	4	4	4
MARSH NURSERIES	340200	423000	2	2	2	2	2	0	2	2	2	2	2	2	2	2
TRIMPELL LTD(SEA OUTFALL)TO HEYSHAM LAKE	341637	458976	3	0	0	3	2	1	0	0	0	1	0	0	0	0
S LAKELAND CARAVANS, MORECAMBE SD46/38	343170	463030	1	1	1	1	1	0	1	1	1	1	1	1	1	1
KIRKHAM OBH(P) WRB NO. SD43/20 7/1.1/11	343270	432480	2	2	2	2	2	0	2	2	2	2	2	2	2	2
FORSHAW SALADS NO2 BH SD42/31B	344050	420030	2	1	2	2	0	2	2	2	2	2	2	2	2	2
FORSHAW SALADS NO1 BH SD42/31A	344410	420650	7	6	7	7	6	1	7	7	7	7	7	7	7	7
ORCHARD END EAGLAND HILL (ICI NO 14)	344770	445550	10	7	10	10	6	4	10	10	10	10	10	10	10	10
00478 GAS 12, 13, 1A @ MUCH HOOLE LFS STATION RD	345600	424200	3	0	0	3	0	3	0	0	0	3	0	0	0	3
00483 AD-HOC @ SALT AYRE LFS OVANGLE RD	345700	462500	18	0	12	19	12	7	12	12	12	19	12	12	0	19
00474 G&G 87 @ CLIFTON MARSH LFS NEWTON	345877	428843	1	0	1	1	1	0	1	1	1	0	1	1	0	1
00474 G&G 86 @ CLIFTON MARSH LFS NEWTON	345940	428830	3	0	3	3	3	0	3	3	3	2	3	3	0	3
00474 G&G 92 @ CLIFTON MARSH LFS NEWTON	345961	428137	4	0	3	4	3	1	3	3	3	4	3	3	0	4
00474 AD-HOC G&G 19, 35, 36, 38, 39A, 40, 42, 43, 44, 50, 58, 60, 62, 77 @ CLIFTON MARSH LFS NEWTON	346000	428000	25	0	19	25	19	6	19	19	19	25	19	19	0	25
PLOCKS FARM, BRETHERTON SD42/34	346020	420800	2	0	2	2	0	2	2	2	2	2	2	2	2	2
00474 G&G 91 @ CLIFTON MARSH LFS NEWTON	346049	428149	1	0	1	1	1	0	1	1	1	1	1	1	0	1
00474 G&G 79 @ CLIFTON MARSH LFS NEWTON	346063	428801	2	0	2	2	2	0	2	2	2	1	2	2	0	2
00474 G&G 90 @ CLIFTON MARSH LFS NEWTON	346170	428203	3	0	2	3	2	1	2	2	2	3	2	2	0	3
00474 G&G 89 @ CLIFTON MARSH LFS NEWTON	346233	428216	1	0	1	1	1	0	1	1	1	1	1	1	0	1
00474 G&G 88 @ CLIFTON MARSH LFS NEWTON	346325	428249	4	0	3	4	3	1	3	3	3	4	3	3	0	4
B.N.F.L. SPRINGFIELDS FACTORY NO2 BH	346500	431800	3	1	3	3	1	2	3	3	3	3	3	3	3	3
00474 G&G 61 @ CLIFTON MARSH LFS NEWTON	346663	428362	2	0	1	2	1	1	1	1	1	1	1	1	0	2
B.N.F.L. SPRINGFIELDS FACTORY NO3 BH	346700	431200	1	1	1	1	0	1	1	1	1	1	1	1	1	1
LANCASTER CANAL AT ALDCLIFFE	346962	460413	2	0	2	2	0	2	0	2	0	2	0	0	0	0
B.N.F.L. SPRINGFIELDS FACTORY NO1 BH	347100	431600	3	2	3	3	2	1	3	3	3	3	3	3	3	3
B.N.F.L. SPRINGFIELDS FACTORY NO4 BH	347200	431000	3	3	3	3	3	0	3	3	3	3	3	3	3	3
LOWER BURROW FARM WELL SD45/9	347650	457220	4	4	4	4	4	0	4	4	4	4	4	4	4	4
WITHINGTON BARN FARM	348000	417800	4	4	4	4	4	0	4	4	4	4	4	4	4	4
DRINKWATER MUSHROOMS SD45/23	349240	454610	1	1	1	1	1	0	1	1	1	1	1	1	1	1
HILLSBOROUGH NURSERIES BH	349380	424610	10	7	10	10	6	4	10	10	10	10	10	10	10	10
C0010 115, 117, GAS 104, GAS 107, GAS112 @ ULNES WALTON LFS, PHASE 2, R	349500	420400	5	0	0	5	0	5	0	0	0	5	0	0	0	5
DRINKWATER MUSHROOMS SD45/22	349970	457170	1	1	1	1	1	0	1	1	1	1	1	1	1	1
00475 22, GAS 1, GAS 24, GAS 501 @ ULNES WALTON, PHASE 1	350000	420000	4	0	0	4	0	4	0	0	0	4	0	0	0	4
THE GABLES BH	350330	461240	8	5	8	8	3	5	8	8	8	8	8	8	8	8
MIDDLE CRAG FARM BH	351030	455110	1	1	1	1	1	0	1	1	1	1	1	1	1	1
00217 AD-HOC @ LIGHTFOOT GREEN FM FULWOO	351200	434000	3	0	3	3	3	0	3	3	3	1	3	3	0	3
MIDDLE CRAG BAY HORSE SD55/16	351320	454920	1	0	1	1	0	1	1	1	1	1	1	1	1	1
NOOK HOUSE SD55/88	351350	454890	1	1	1	1	0	1	1	1	1	1	1	1	1	1
BARTON GRANGE NURSERY	352440	437150	10	7	10	10	6	4	10	10	10	10	10	10	10	10
PRESTON LAUNDRY SD53/66	353900	430200	1	1	1	1	1	0	1	1	1	1	1	1	1	1
LOW MOOR HEAD FARM	354120	456160	4	4	4	4	4	0	4	4	4	4	4	4	4	4
CATSHAW HALL FARM BH	354690	453540	8	5	8	8	4	4	8	8	8	8	8	8	8	8
SUPREME LAUNDRY ABS BH PRESTON	354910	429700	4	4	4	4	4	0	4	4	4	4	4	4	4	4
BROCKHOLES VIEW (LIQUID PLASTICS)	355230	429460	2	2	2	2	2	0	2	2	2	2	2	2	2	2
BELL HILL	355400	461300	2	2	2	2	2	0	2	2	2	2	2	2	2	2
ROYAL ORDNANCE SD52/81	356050	420300	1	1	1	1	1	0	1	1	1	1	1	1	1	1
MIDDLE LEE FARM SPRING SD55/10	356290	455960	3	3	3	3	3	0	3	3	3	3	3	3	3	3
00074 AD-HOC @ CLAYTON HALL SAND QY, DAW	356600	421500	5	0	2	5	2	3	2	2	2	5	2	2	0	5
KEPACK, BAMBER BRIDGE SD52/80	356626	425036	1	1	1	1	1	0	1	1	1	1	1	1	1	1
WOODFOLD FARMHOUSE	356820	442180	1	1	1	1	1	0	1	1	1	1	1	1	1	1
FYLDE ICE COLD STORAGE,B BDGE SD52/79	357490	425590	1	1	1	1	1	0	1	1	1	1	1	1	1	1
SALLOM HOUSE FARM BH	358020	428310	10	7	10	10	6	4	10	10	10	10	10	10	10	10
INTERBREW UK LTD	358260	429680	2	2	2	2	2	0	2	2	2	2	2	2	2	2
BROCKHOLES QUARRY SD53/76	358630	430790	1	1	1	1	1	0	1	1	1	1	1	1	1	1
SUNLIGHT SERVICES, CHORLEY BH SD51/192	358790	419030	3	3	3	3	3	0	3	3	3	3	3	3	3	3
KEEPERS COTTAGE,MARSHAW,SPRING SD55/13	359400	453700	4	4	4	4	4	0	4	4	4	4	4	4	4	4
ELSTON OLD HALL FARM BH	360000	432500	9	6	9	9	5	4	9	9	9	10	9	9	9	9
SINGLETON'S DAIRY BOREHOLE	360180	437000	10	7	10	10	5	5	10	10	10	10	10	10	10	10
SIMPSONS FARM BH	360720	428590	10	7	10	10	6	4	10	10	10	10	10	10	10	10
SADDLESIDE SPRINGS	361300	445900	1	0	1	1	0	1	1	1	1	1	1	1	1	1
POLE FARM, CHIPPING SD64/69	362710	442000	1	0	1	0	0	1	1	1	1	1	1	1	1	1
PARK GATE, CHIPPING SD64/68	362710	445360	1	0	1	1	0	1	1	1	1	1	1	1	1	1
C0006 AD-HOC, GAS 20, GAS 27, GAS 5 @ WITHNELL QY, BOLTON RD, W	363900	424000	10	0	7	10	7	3	7	7	7	10	7	7	0	10
STAR PAPER MILLS BOREHOLE "C"	364210	424980	1	0	4	4	3	1	1	4	1	4	4	4	1	4
LOWER GREYSTONELEY BH	364300	445200	9	6	9	9	5	4	9	9	9	9	9	9	9	9
STAR PAPER MILLS BOREHOLE "L"	364340	424770	1	0	1	1	0	1	1	1	1	1	1	1	1	1
STAR PAPER MILLS BOREHOLE "F"	364340	424900	8	7	8	8	6	2	8	8	8	8	8	8	8	8
NEW DROP INN BH	364420	439010	10	7	10	10	5	5	10	10	10	10	10	10	10	10
TWISTFIELD BH	364530	427830	9	7	10	9	6	4	10	10	10	10	10	10	10	10
00029 G&G 3, 6, 7 @ STOCKCLOUGH QY STOCKCLOUGH	365014	424687	3	0	1	3	1	2	1	1	1	3	1	1	0	3
WATSONS FARM RADDLESWORTH	365480	420830	10	7	10	10	6	4	10	10	10	10	10	10	10	10
